# Supplementary material for: Two Types of PPARγ Ligands Identified in the Extract of Artemisia campestris
Source: MDPI journal article supplement (doi:10.3390/chemistry3020045), 2021-05-23
Supplement: s1 [file s1]

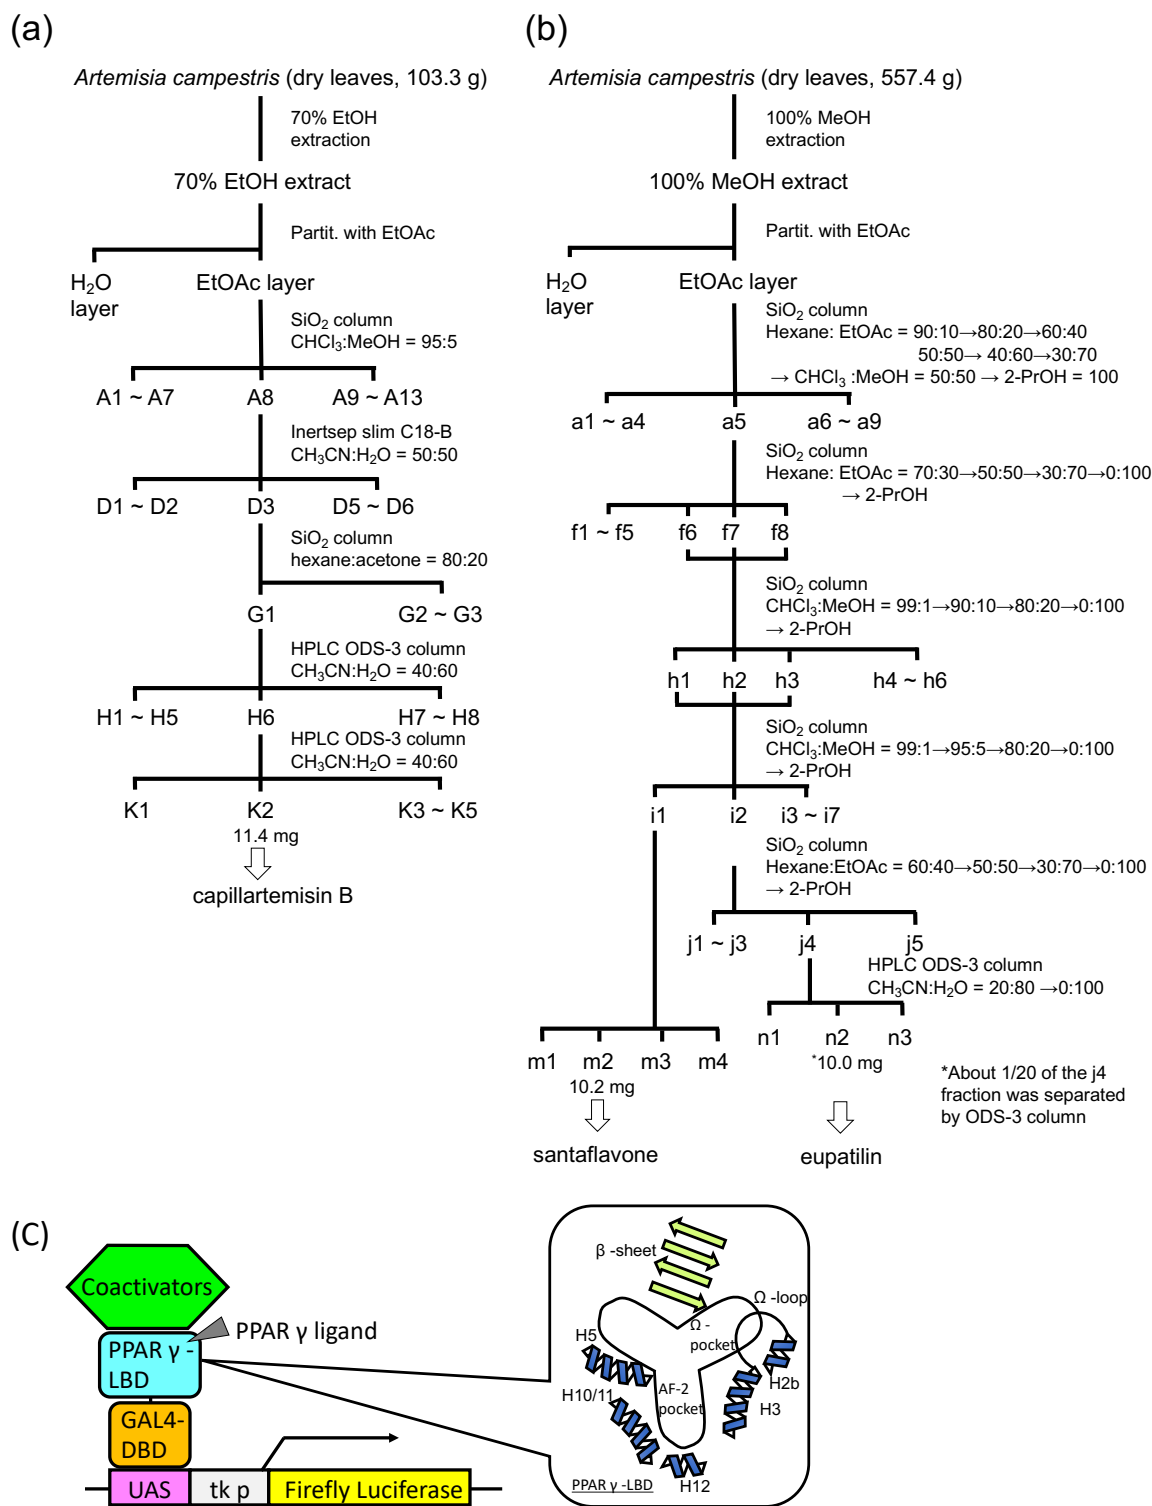

Supplemental Figure S1. Purification scheme and the luciferase reporter system.

Purification scheme of capillartemisin B (a) or santaflavone or eupatilin (b) that contain transactivation potential of PPAR $\gamma$  from the 70% extract or the methanol extract of *Artemisia campestris*, respectively. The luciferase reporter system employed in this study and putative ligand-dependent recruitment of coactivators (c). UAS; upstream activation sequence, tk p; thymidine kinase promoter, GAL4-DBD; GAL4-DNA binding domain, PPAR $\gamma$ -LBD; PPAR $\gamma$  ligand binding domain.
